# Supplementary material for: Arrhythmogenic Cardiomyopathy Is a Multicellular Disease Affecting Cardiac and Bone Marrow Mesenchymal Stromal Cells
Source: MDPI journal article supplement (doi:10.3390/jcm10091871), 2021-04-26
Supplement: s1 [file s1]

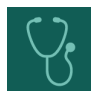

Article

# Arrhythmogenic Cardiomyopathy is a multicellular disease affecting cardiac and bone marrow mesenchymal stromal cells

## Supplementary Content:

- Supplementary Methods
- Supplementary Tables (1–3)
- Supplementary Figures (1–7)
- Supplementary Figure Legends (1–7)

## 1. Supplementary Methods

### SM. 1. Bone marrow processing and staining.

Femurs were harvested from 4-month-old control and *Dsg2<sup>mut/mut</sup>* mice, cleaned to remove contaminating tissues and muscles, and fixed in 4% paraformaldehyde (PFA, w:v in PBS) at room temperature for 4 hours. After fixation, samples were washed and incubated in 0.5 M EDTA for one week at 4 °C. After 7 days, femurs were embedded in OCT (Kalttek) and frozen in 2-methylbutane (Sigma) cooled by immersion in liquid nitrogen. Ten-micron longitudinal cryosections were obtained with a cryostat Leica CM1950 and used for histological and IF analyses.

### SM. 2. Immunofluorescence analysis of femurs sections.

After a brief permeabilization in 1X PBS, supplemented with 1% bovine serum albumin (BSA) and 0.5% Triton X-100 (all from Sigma), femur cryosections were incubated with a rabbit anti-perilipin1 antibody (1:200, Cell Signaling) overnight at 4 °C. The primary antibody was revealed by a 488-conjugated anti-rabbit (1:200, Jackson Lab). Sections were analyzed with a fluorescence microscope Leica DM6B (equipped with the CDD camera DFC300FX and the IM1000 software).

### SM. 3. Immunofluorescence analysis of cultured cells.

Cells were fixed in 3.7% formaldehyde (v:v, in PBS) and stained with either AlexaFLUOR®-568 conjugated phalloidin (1:100, Thermo Fisher Scientific) or rabbit anti- $\alpha$ -tubulin antibody (1:100, Sigma). Cells were imaged with a ZEISS LSM900 with Airyscan II confocal microscopy, and images were analyzed to calculate cell area, perimeter, and perimeter/area ratio, using Fiji-ImageJ software [21].

### SM. 4. In vitro proliferation assay.

BM- and C-MSCs from both *Dsg2<sup>mut/mut</sup>* and control mice were cultured in DMEM 1 g/L (Lonza), supplemented with 2mM P/S (Lonza) and 2 mM L-glutamine (Gibco). Cells were incubated for 48 consecutive hours with 5-Bromo-2'-deoxyuridine-BrdU 10  $\mu$ M BrdU (Sigma) and then processed with the fixation/permeabilization solution kit (BD Cytofix/Cytoperm™), according to manufacturer's instruction. Cells were stained with an AlexaFLUOR®-647 MoBU1-antiBrdU (1:50, Thermo Fisher Scientific) and analyzed with FACS Canto II. Data analysis was performed with FlowJo software.

### SM. 5. In vivo proliferation assay.

Two-week-old *Dsg2<sup>mut/mut</sup>* mice and age- and sex-matched littermate controls were injected with BrdU (100 mg/kg, i.p.; Sigma). After 24 hours, mice were sacrificed, and organs (heart and BM) were processed as described in Materials and Methods. Cells were stained with AlexaFluor647 MoBU1-antiBrdU (1:50, Thermo Fisher Scientific) in

combination with antibodies specific for CD45, CD44, or CD90 (**Suppl. Table 1**). Cells were analyzed with FACS Canto II, and data were analyzed with FlowJo software.

## 2. Supplementary Tables

**Supplementary Table S1.** List of antibodies used in this study for FACS analyses.

| Antibody                                                                          | Supplier         |
|-----------------------------------------------------------------------------------|------------------|
|  |                  |
| PerCP anti-CD45                                                                   | BD               |
| PE anti-CD117                                                                     | Miltenyi Biotect |
| Pacific Blue™ anti-mouse CD73                                                     | BioLegend        |
| APC anti-CD11b                                                                    | BD               |
| I-A/I-E MHCI FITC                                                                 | BD               |
| PE anti-mouse Ly-6A/E (Sca-1)                                                     | BioLegend        |
| PE anti-CD90                                                                      | BD               |
| APC anti-CD44                                                                     | BioLegend        |
| FITC anti-mouse CD106                                                             | BioLegend        |

**Supplementary Table S2.** Oligos used in this study for RTqPCR analysis.

| gene        | Forward primer               | Reverse primer               |
|-------------|------------------------------|------------------------------|
| Dsc2        | 5'-CTGTGGGATCTATGCGCTCC-3'   | 5'-TCCATCAGGTTCACTCTGCC-3'   |
| Dsg2 C-term | 5'-GTGCGCCATTCAGCTTCTCC-3'   | 5'-AGTGAGCTGAAGGACCTGCC-3'   |
| Dsg2 N-term | 5'-TGCTTGGACTTTGGAACGGAC-3'  | 5'-TTCTGGACAGGTCTTCGCCC-3'   |
| Dsg2 tot    | 5'-ACGCACCAGGAAAGTACCAG-3'   | 5'-GAGCTGAAGGACCTGCCTTT-3'   |
| Dsp         | 5'-CAAAAGCAGGCTTTAGAGGCAT-3' | 5'-CTTACCAGCAGGCTCTCTC-3'    |
| Gapdh       | 5'-CACCATCTTCCAGGAGCGAG-3'   | 5'-CCTTCTCCATGGTGGTGAAGAC-3' |
| Jup         | 5'-ATCCACGCCATCCTGAGAGC-3'   | 5'-CACAGAGCCAGGTTCCGGAT-3'   |
| Pkp2        | 5'-CCACAGCCTCTGCTTGCTAT-3'   | 5'-CTTGTGGGGGCATAGCCTT-3'    |

**Supplementary Table S3.** List of primary antibodies used in this study for IF and WB analyses. m, mouse; Rb, rabbit.

| Antibody                   | Dilution | Supplier                 |
|----------------------------|----------|--------------------------|
| DSC2 (m)                   | 1:200    | Santa Cruz               |
| DSG2 C-term (Rb)           | 1:1000   | Abcam                    |
| GAPDH (m)                  | 1:10.000 | Abcam                    |
| JUP (Rb)                   | 1:500    | Abcam                    |
| Perilipin-1 (Rb)           | 1:200    | Cell Signaling           |
| Phalloidin AlexaFLUOR®-568 | 1:100    | Thermo Fisher Scientific |
| PKP2 (m)                   | 1:100    | Progen                   |
| α-Tubulin (m)              | 1:100    | Sigma                    |

### 3. Supplementary Figures

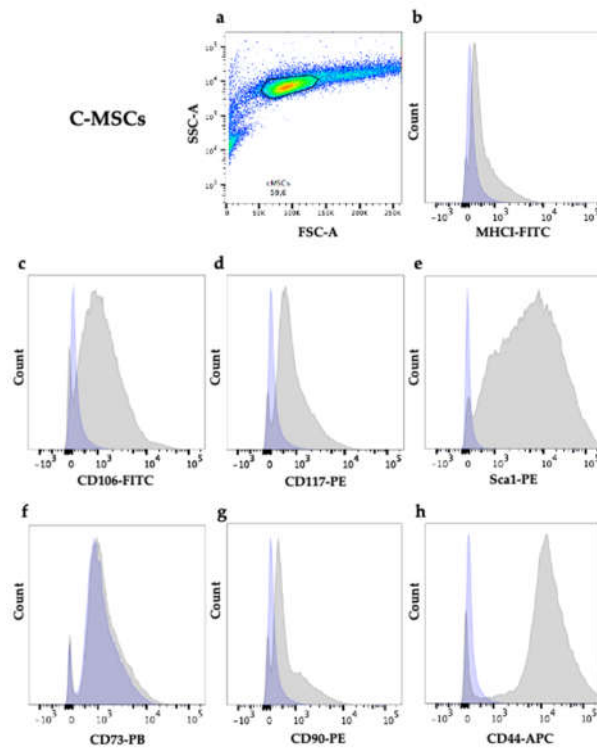

**Figure S1.** Flow cytometry characterization of cardiac mesenchymal stromal cells (C-MSCs). (a) Representative dot-plot of cultured control C-MSCs gated according to forward scatter (FSC-A) and side scatter (SSC-A). (b–h) Cells were stained with a panel of different antibodies to define the mesenchymal stromal cell phenotype. Histograms show the expression of each marker (indicated on the x axis of the respective histogram) within the CD45-/CD11b- subset (grey area). The blue area refers to unstained cells, used as negative control.

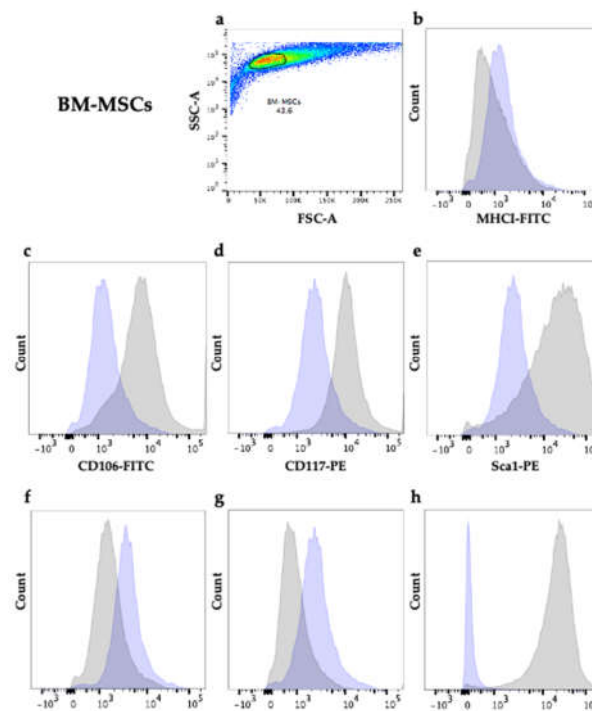

**Figure S2.** Flow cytometry characterization bone marrow-mesenchymal stromal cells (BM-MSCs). (a) Representative dot-plot of cultured control BM-MSCs gated according to forward scatter (FSC-A) and side scatter (SSC-A). (b–h) Cells were stained with a panel of different antibodies to define the mesenchymal stromal cell phenotype. Histograms show the expression of each marker (indicated in the x axis of the respective histogram) within the CD45<sup>+</sup>/CD11b<sup>+</sup> subset (grey area). The blue area refers to unstained cells, used as negative control.

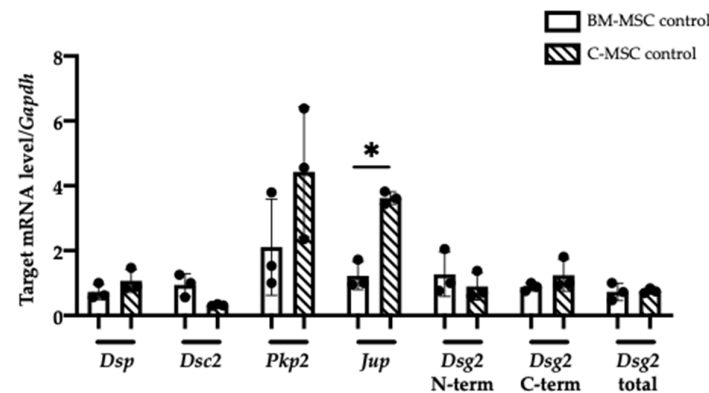

**Figure S3.** Cardiac- and bone marrow-mesenchymal stromal cells (MSCs) express desmosomal genes. RT-qPCR on extracts from cultured cardiac- and BM-derived MSCs isolated from adult control mice to assess the expression levels of desmosomal genes. Bars represent mean, and error bars represent the relative standard deviation (SD).  $n = 3$  samples for each group. The experiment was repeated three times. \*  $p \leq 0.05$ . *Dsp*, desmoplakin; *Dsc2*, desmocollin-2; *Dsg2*, desmoglein-2; *Jup*, plakoglobin; *Pkp2*, plakophilin-2.

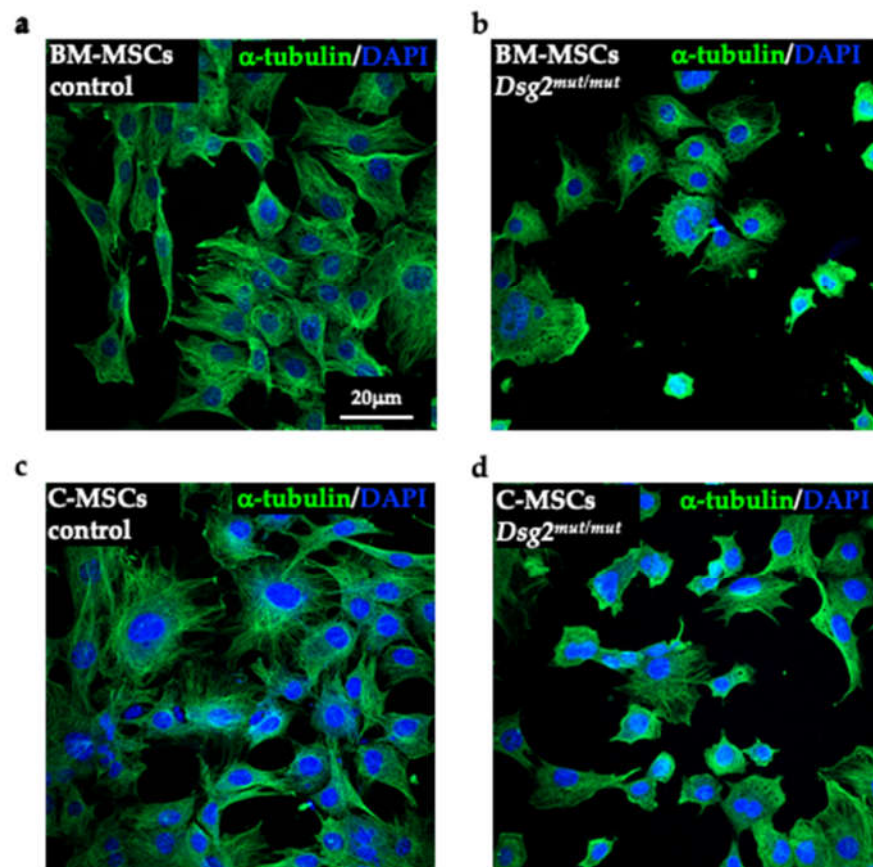

**Figure 4.** AC-linked *Dsg2* variant affects microtubule organization in both cardiac- and bone marrow-mesenchymal stromal cells. (a–d) Confocal IF analysis of cultured BM- (a–b) and cardiac- (c–d) MSCs, stained with an antibody specific for  $\alpha$ -tubulin (green signal). Nuclei were counterstained with DAPI (blue signal).

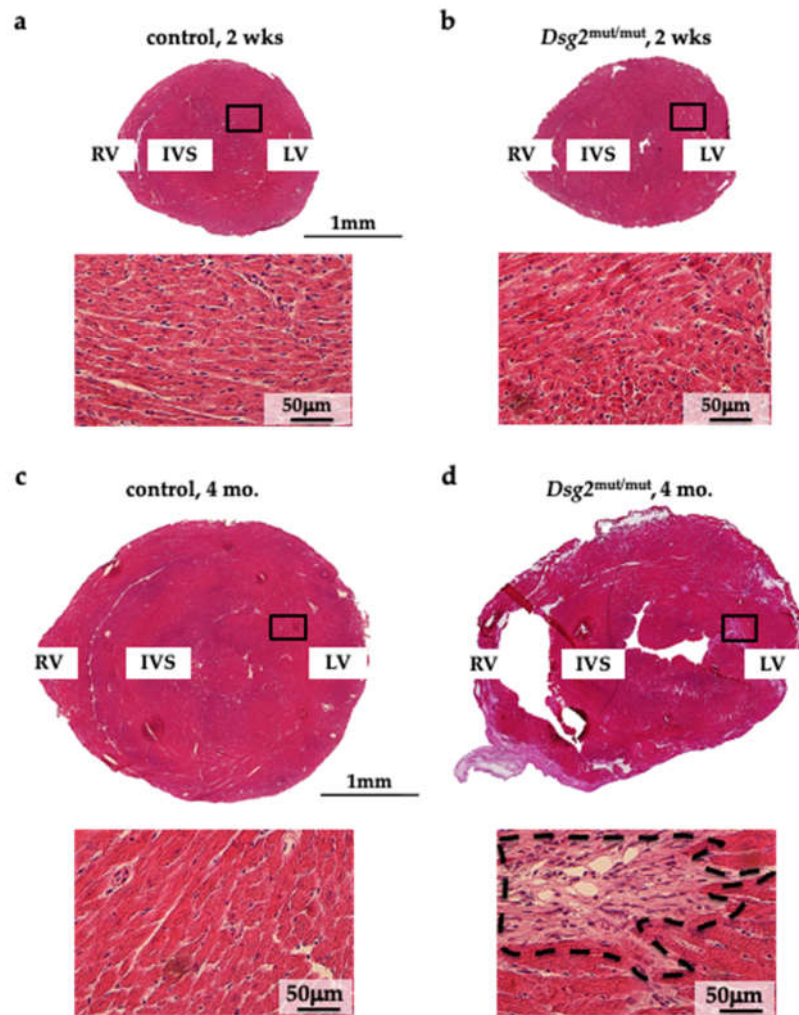

**Figure 5.** AC-linked *Dsg2* variant progressively affects heart morphology. (a–d) Hematoxylin-eosin staining of heart cryosections, from the mid portion of the ventricles, from 2-week-old (a–b) vs. 4-month-old (c–d) control (a, c) and *Dsg2<sup>mut/mut</sup>* (b, d) mice. Bottom images in (a–d) are high magnifications of the black boxes in the corresponding heart sections. RV, right ventricle; IVS, interventricular septum; LV, left ventricle.

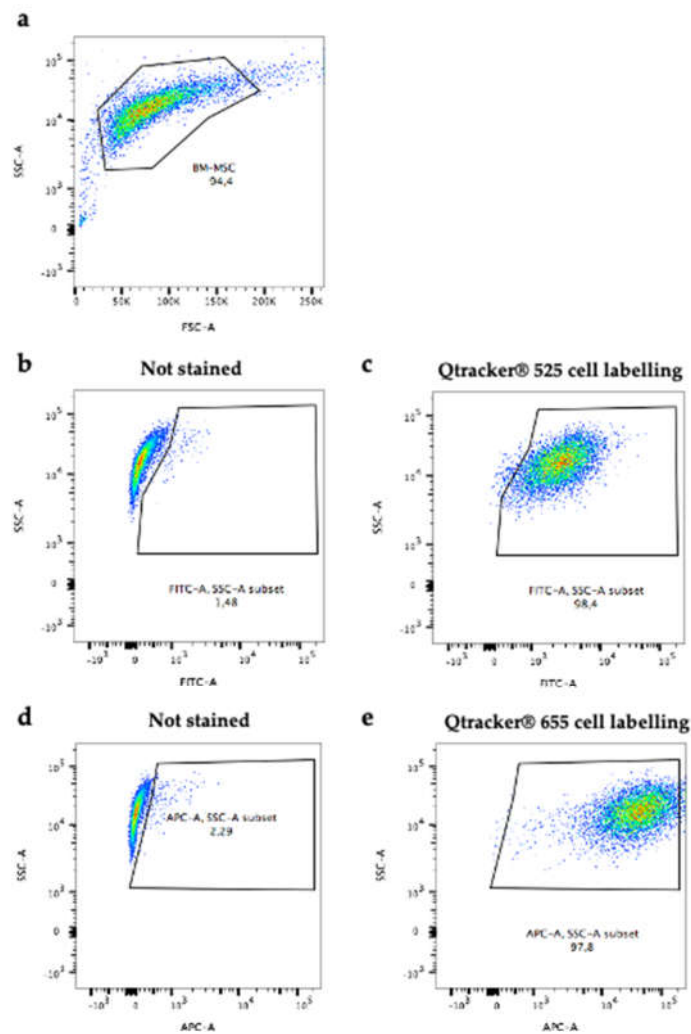

**Figure 6.** Flow cytometry characterization of the efficiency of BM-MSC labelling with Qtracker®. (a) Representative dot-plot of BM-MSCs gated according to forward scatter (FSC-A) and side scatter (SSC-A). (b–e) Representative dot-plots of unstained BM-MSCs (b,d) vs. cells labelled with Qtracker® 525 (c) or Qtracker® 655 (d). (b) and (d) are the controls of (c) and (e), respectively.

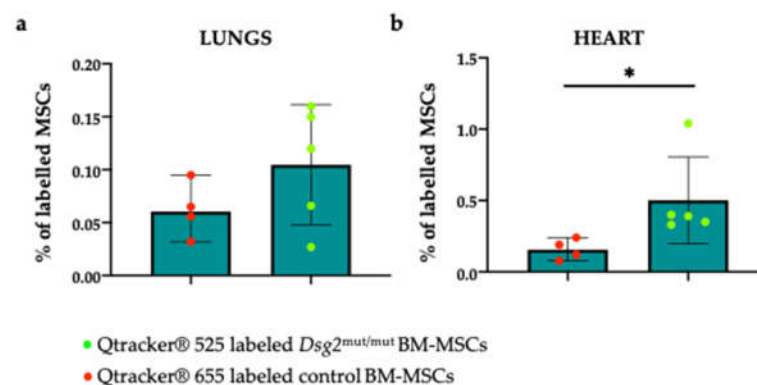

**Figure 7.** *Dsg2<sup>mut/mut</sup>* bone marrow-mesenchymal stromal cells preferentially home to the heart, compared with control BM-MSCs. (a–b) Ex vivo flow cytometry analysis of lungs (a) and hearts (b) of adult *Dsg2<sup>mut/mut</sup>* mice injected with either AC or control BM-MSCs, labelled with Qtracker® 525- (in green) or Qtracker® 655- (in red), respectively. The percentage of labelled cells per organ

normalized over the total number of cells obtained from enzymatic digestion was evaluated. Bars represent the median with 95% confidence interval (CI).  $n = 4$  mice for each group. \*  $p \leq 0.05$ .
